# Supplementary material
Source: PubMed Central journal article supplement (PMC1626602)
Supplement: plntcell_tpc.106.041061_1.pdf [file plntcell_tpc.106.041061_1.pdf]

Hua and Kao, Supplemental Figure 1

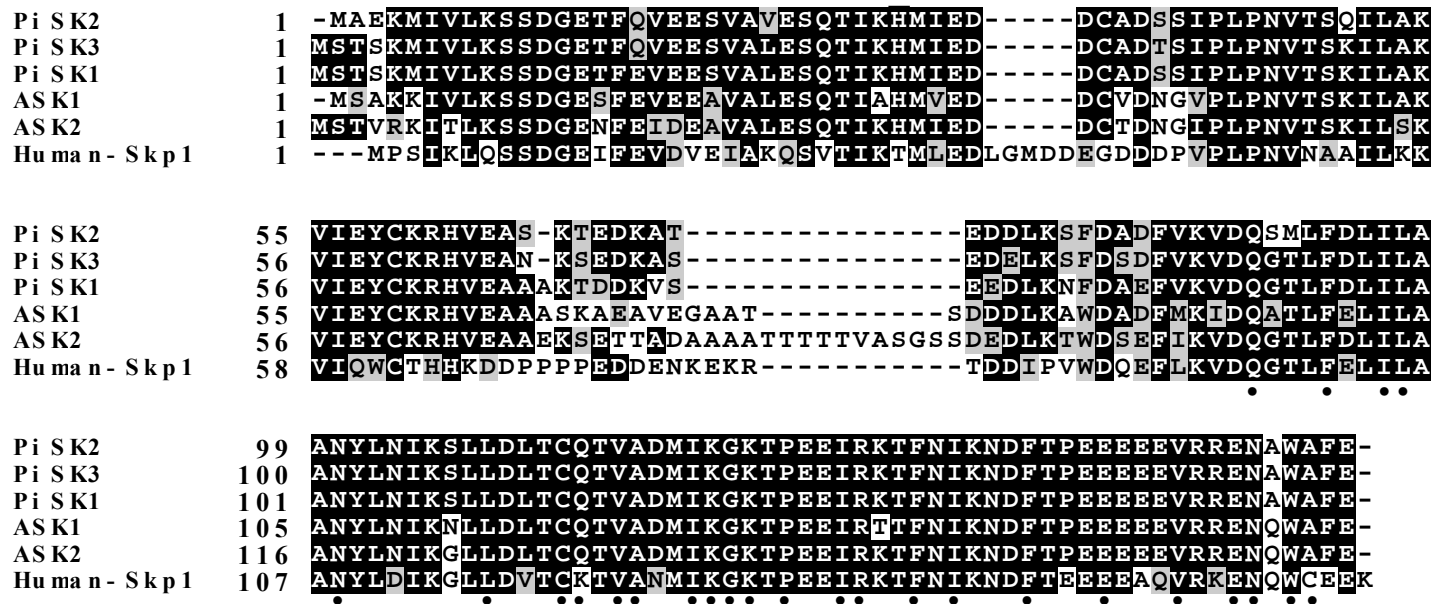

**Supplemental Figure 1. Alignment of Amino Acid Sequences of Pi SK1, Pi SK2 and Pi SK3 of *P. inflata*, ASK1 and ASK2 of *Arabidopsis*, and a Skp1 of human.** For a given site, the amino acid that is present in at least three of the sequences is highlighted in dark shading, and the amino acid(s) that is (are) similar to the residue in dark shading is (are) highlighted in gray shading. The black dots show the amino acid residues important for the interactions between the human Skp1 and an F-box protein, Skp2 (Schulman et al., 2000; Zheng et al., 2002).
