# Supplementary material
Source: PubMed Central journal article supplement (PMC1626602)
Supplement: plntcell_tpc.106.041061_2.pdf [file plntcell_tpc.106.041061_2.pdf]

## Hua and Kao, Supplemental Figure 2

|         |     |                                                                                                 |    |                                                               |
|---------|-----|-------------------------------------------------------------------------------------------------|----|---------------------------------------------------------------|
| Pi SBP1 | 1   | MA LP HHH LQ LHI QQ QP                                                                          | -- | QQS KS YRD IY NNM DG Q IS TP VAY FN GSN LP EQS OH PPY IP P    |
| Ph SBP1 | 1   | -- G T S H LQ LHI QQ QP                                                                         | -- | QQS KS YRD IY NNM DG Q IS TP VAY FN C SN LP EQS OH PPY IP P   |
| Sc SBP1 | 1   | MA LP HHH LQ LHI QQ QP                                                                          | HQ | QQS KS YRD IY NNM DG Q I T TP V V Y FN GSN LP EQS OH PPY IP P |
|         |     |                                                                                                 |    |                                                               |
| Pi SBP1 | 59  | FQ VV GLA PG LVD DG GLD LQ WNY GL E PK RK RPK EQ D FL EN NNS QI SSI DF LQP RS VST GL G          |    |                                                               |
| Ph SBP1 | 56  | FQ VV GLA PG LVD DG GLD LQ WNY GL E PK RK RPK EQ D FL EN NNS QI SSI DF LQP RS VST GL G          |    |                                                               |
| Sc SBP1 | 61  | FQ VV GLA PG T A D DG GLD LQ WNY GL E PK K K RPK EQ D F M EN NNS QI S S V D L F Q R RS VST GL G |    |                                                               |
|         |     |                                                                                                 |    |                                                               |
| Pi SBP1 | 119 | LS LD NGR LA SSG DS AFL GL VGD DI ERE LQ RQD AE IDR YI KVQ GD RLR QA ILE KV QAN QL Q            |    |                                                               |
| Ph SBP1 | 116 | LS LD NGR LA SSG DS AFL GL VGD DI ERE LQ RQD AE IDR YI KVQ GD RLR QA ILE KV QAN QL Q            |    |                                                               |
| Sc SBP1 | 121 | LS LD NGR LA S S C DS AFL GL VGD DI ERE LQ RQD AE IDR YI KVQ GD RLR QA V L E KV QAN Q I Q       |    |                                                               |
|         |     |                                                                                                 |    |                                                               |
| Pi SBP1 | 179 | TV TY VEE KV I QK LR EKE TE VED IN KKN ME LEL RT EQL AL EAN AW QQR AK YNE NL INT LK V           |    |                                                               |
| Ph SBP1 | 176 | TV TY VEE KV I QK LR EKE TE VED IN KKN ME LEL RT EQL AL EAN AW QQR AK YNE NL INT LK V           |    |                                                               |
| Sc SBP1 | 181 | A I TY VEE KV I QK LR ERD TE V D D IN KKN ME LEL R M E Q L D L EAN AW QQR AK YNE NL INT LK V    |    |                                                               |
|         |     |                                                                                                 |    |                                                               |
| Pi SBP1 | 239 | NL QH VYA QS RDS KE GCG DS EVD DT ASC CN GRA TD LHL LC RDS NE MKE LM TCK VC RVN EV S            |    |                                                               |
| Ph SBP1 | 236 | NL E H VYA QS RDS KE GCG DS EVD DT ASC CN GRA TD LHL LC RDS NE MKE LM TCK VC RVN EV S           |    |                                                               |
| Sc SBP1 | 241 | NL QH VYA QS RDS KE GCG DS EVD DT ASC CN GRA TD LHL LC RDS K E MKE LM T C R V C R T N EV C      |    |                                                               |
|         |     |                                                                                                 |    |                                                               |
| Pi SBP1 | 299 | ML LL PCK HL CLC KE CES KL SLC PL CQS TK YI GME I YM                                            |    |                                                               |
| Ph SBP1 | 296 | ML LL PCK HL CLC KE CES KL SLC PL CQS TK YI GME I YM                                            |    |                                                               |
| Sc SBP1 | 301 | ML LL PCK HL CLC KE CES KL SLC PL CQS TK YI GME V YM                                            |    |                                                               |
|         |     | * * * * *                                                                                       |    |                                                               |

**Supplemental Figure 2. Alignment of the Deduced Amino Acid Sequences of Pi SBP1 of *P. inflata*, Ph SBP1 of *P. hybrida* and Sc SBP1 of *S. chacoense*.** At a given site, the amino acid that is present in at least two of the three sequences is highlighted in dark shading, and the amino acid that is similar to the residue in dark shading is highlighted in gray shading. The RING-HC finger motif is enclosed in the box region, with the asterisks indicating the cysteine-histidine signature of the motif. The predicted coiled-coil region is overlined.
