# Supplementary material
Source: PubMed Central journal article supplement (PMC1626602)
Supplement: plntcell_tpc.106.041061_3.pdf [file plntcell_tpc.106.041061_3.pdf]

### Hua and Kao, Supplemental Figure 3

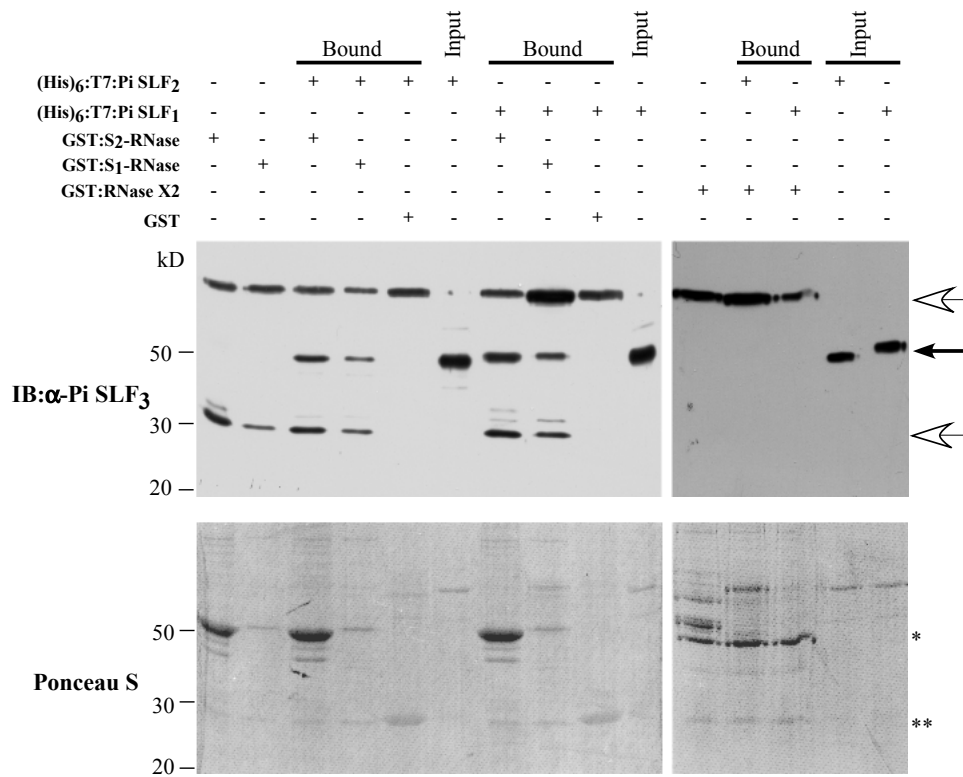

### Supplemental Figure 3. In vitro Binding Assay of Interactions of Pi SLFs with S<sub>1</sub>-RNase, S<sub>2</sub>-RNase, and RNase X2.

Purified (His)<sub>6</sub>:T7:Pi SLF<sub>2</sub> and (His)<sub>6</sub>:T7:Pi SLF<sub>1</sub> were separately incubated with GST:S<sub>1</sub>-RNase-, GST:S<sub>2</sub>-RNase-, GST:RNase X2-, and GST-bound Glutathione Sepharose 4 Fast Flow resin. The bound proteins were eluted and analyzed by immunoblotting using an anti-Pi SLF<sub>3</sub> antibody, which cross-reacts with Pi SLF<sub>1</sub> and Pi SLF<sub>2</sub>, indicated as a darkened arrow in top panels. The PiSLF antibody was raised in rabbits against a synthetic peptide corresponding to the last 14 amino acids at the C-terminal end of Pi SLF<sub>3</sub>. The open arrows indicate cross-reacting bacterial proteins that co-purified with the GST tagged proteins. The “input” lanes were used as positive controls for the (His)<sub>6</sub>:T7 tagged proteins, and the lanes containing GST:S<sub>1</sub>-RNase, GST:S<sub>2</sub>-RNase and GST:RNase X2 alone were used as negative controls to show that there were no cross-reacting proteins of the sizes similar to those of the (His)<sub>6</sub>:T7 tagged proteins. Bottom panels: Ponceau S staining of the immunoblots before immunoblotting. The single asterisk indicates the GST:S<sub>1</sub>-RNase, GST:S<sub>2</sub>-RNase and GST:RNase X2 bands, and the double asterisks indicate the GST band.
