# Supplementary material
Source: PubMed Central journal article supplement (PMC1626602)
Supplement: plntcell_tpc.106.041061_4.pdf [file plntcell_tpc.106.041061_4.pdf]

## Hua and Kao, Supplemental Figure 4

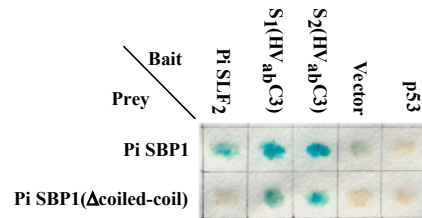

**Supplemental Figure 4. Role of the Coiled-Coil Region of Pi SBP1 in Interactions with Pi SLF<sub>2</sub> and Truncated S-RNases.** Pi SBP1(Δcoiled-coil), a truncated Pi SBP1 without the coiled-coil region, was tested for interactions with Pi SLF<sub>2</sub> and two truncated S-RNases (described in Figure 4A) by the yeast two-hybrid assay. Pi SBP1 was included as a positive control, and pGBD-C1 and p53 were included as negative controls.  $\beta$ -galactosidase activity assay was performed as described in the legend to Figure 1 except that the filter paper was incubated for 5 hr at 30°C.
