# Supplementary material
Source: PubMed Central journal article supplement (PMC1626602)
Supplement: plntcell_tpc.106.041061_7.pdf [file plntcell_tpc.106.041061_7.pdf]

## Hua and Kao, Supplemental Figure 7

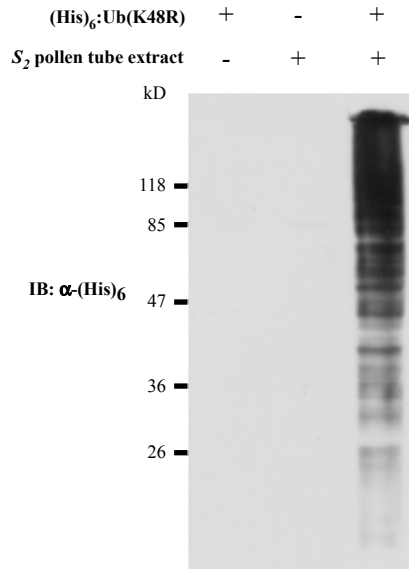

**Supplemental Figure 7. Ubiquitination assay of total protein in *S*<sub>2</sub> pollen tube extract.** (His)<sub>6</sub>:Ub(K48R), expressed and purified from *E. coli* BL21(DE3)pLysS (Novagen), was used in the assay. The replacement of Lys-48 by Arg in Ub(K48R) blocked the formation of poly ubiquitin chains but still allowed the attachment of mono ubiquitin units to target proteins. Five micrograms of *S*<sub>2</sub> pollen tube extract were incubated in 30  $\mu$ L ubiquitin reaction buffer (50 mM Tris-HCl, pH 7.4, 2 mM ATP, 2 mM DTT, 5 mM MgCl<sub>2</sub>, ~4  $\mu$ g creatine phosphokinase [Calbiochem], 10 mM creatine phosphate [Calbiochem], 1 mM PMSF) for 1 hr at 30°C in the presence or absence of 30  $\mu$ g of (His)<sub>6</sub>:Ub(K48R). The reactions were stopped by the addition of 7  $\mu$ L 5  $\times$  SDS reducing sample buffer and subsequent heating at 95° C for 5 min. The samples were analyzed by immunoblotting using an anti-(His)<sub>6</sub> tag antibody. The strong smear signals detected by the antibody indicate that many proteins in the pollen tube extract were ubiquitinated.
